# Supplementary material
Source: publisher figshare collection journal article supplement (https://gsajournals.figshare.com/ndownloader/files/22312035)
Supplement: Supplementary file 1 [file 22312035]

## Sheet: Sheet1
S7 Table: RNAseq analysis of RM11 with and without Credit41 treatment
Systematic name	baseMean	log2FoldChange	lfcSE	stat	pvalue	padj	geneName
YHR139C	106.741	-2.32661	0.169195	-12.9451	2.5e-38	8.07e-36	SPS100
YPL223C	1547.3	-2.21247	0.104346	-21.2133	7.2e-100	4.41e-96	GRE1
YKL163W	172.047	-1.94234	0.141052	-13.6487	2.06e-42	8.39e-40	PIR3
YBR117C	1196.25	-1.79258	0.125714	-14.2878	2.61e-46	1.33e-43	TKL2
YMR175W	1812.37	-1.69703	0.116257	-14.6224	2.02e-48	1.38e-45	SIP18
YDR070C	2306.5	-1.60476	0.0846057	-18.972	2.91e-80	4.45e-77	FMP16
YGR043C	1336.3	-1.52987	0.0790732	-19.3476	2.14e-83	4.36e-80	NQM1
YLR411W	119.053	-1.50596	0.211159	-7.11807	1.09e-12	5.24e-11	CTR3
YEL039C	132.993	-1.44643	0.185687	-7.83848	4.56e-15	2.66e-13	CYC7
YMR169C	4766.43	-1.4221	0.0926153	-15.3619	2.95e-53	2.58e-50	ALD3
YCL048W-A	28.5956	-1.38202	0.191567	-6.97293	3.1e-12	1.44e-10	NA
YPL036W	1114.55	-1.35321	0.104855	-12.9276	3.15e-38	9.64e-36	PMA2
YMR174C	2603.56	-1.34098	0.103299	-12.9883	1.43e-38	4.85e-36	PAI3
YER096W	157.812	-1.33795	0.130631	-10.2349	1.38e-24	1.88e-22	SHC1
YDL223C	6487.4	-1.33696	0.0682017	-19.607	1.35e-85	4.13e-82	HBT1
YHR022C	16.0875	-1.31835	0.203313	-6.06373	1.33e-09	3.92e-08	NA
YJL116C	383.977	-1.27426	0.113373	-11.2655	1.94e-29	4.1e-27	NCA3
YGL117W	81.9581	-1.23814	0.123306	-9.86342	6e-23	7.06e-21	NA
YMR096W	292.126	-1.224	0.0958899	-12.7189	4.64e-37	1.35e-34	SNZ1
YGR256W	1476.35	-1.20712	0.0741298	-16.2864	1.23e-59	1.26e-56	GND2
YPR124W	363.54	-1.17577	0.197573	-5.89064	3.85e-09	1.06e-07	CTR1
YMR107W	36.6613	-1.14614	0.184636	-6.16962	6.85e-10	2.14e-08	SPG4
YOR134W	238.961	-1.13142	0.100702	-11.2037	3.91e-29	7.72e-27	BAG7
YDL085W	274.277	-1.0817	0.0971879	-11.133	8.67e-29	1.61e-26	NDE2
YGR248W	120.797	-1.07787	0.127573	-8.4261	3.57e-17	2.52e-15	SOL4
YBR147W	1050.02	-1.06977	0.125563	-8.50457	1.82e-17	1.41e-15	RTC2
YHR096C	387.816	-1.05318	0.128884	-8.19569	2.49e-16	1.61e-14	HXT5
YPR193C	137.461	-1.05067	0.111135	-9.42329	4.37e-21	4.4e-19	HPA2
YBR145W	623.36	-1.04922	0.119963	-8.70635	3.14e-18	2.56e-16	ADH5
YIL136W	891.316	-1.0457	0.169296	-6.17531	6.6e-10	2.07e-08	OM45
YCL025C	4816.53	-1.04536	0.115015	-9.26191	2.01e-20	1.86e-18	AGP1
YER024W	662.088	-1.04278	0.0714296	-14.5729	4.18e-48	2.56e-45	YAT2
YGR088W	2384.38	-1.01044	0.0819671	-12.3313	6.15e-35	1.71e-32	CTT1
YMR317W	23.6698	1.00036	0.221321	4.30991	1.63e-05	0.000214206	NA
YBR101C	212.218	1.00566	0.113857	8.79879	1.38e-18	1.16e-16	FES1
YJR152W	111.563	1.00608	0.110018	9.03279	1.67e-19	1.46e-17	DAL5
YLR142W	132.883	1.01537	0.104631	9.63365	5.76e-22	6.19e-20	PUT1
YJL214W	11.154	1.0272	0.221953	4.35563	1.33e-05	0.000179967	HXT8
YHR052W-A	5.05158	1.04395	0.21477	4.27649	1.9e-05	0.000242778	NA
YNL034W	36.8757	1.10399	0.221897	4.85886	1.18e-06	2.04e-05	NA
YMR058W	4386.34	1.11325	0.117217	9.48936	2.32e-21	2.41e-19	FET3
YFL052W	34.7582	1.13003	0.176259	6.2792	3.4e-10	1.13e-08	ZNF1
YLR327C	342.682	1.1424	0.148227	7.65237	1.97e-14	1.09e-12	TMA10
YKR093W	633.308	1.1529	0.118019	9.88783	4.7e-23	5.65e-21	PTR2
YPL054W	327.896	1.19239	0.0980343	12.1257	7.72e-34	2.06e-31	LEE1
YCR021C	155.31	1.22671	0.20986	5.36251	8.21e-08	1.81e-06	HSP30
YNL077W	226.422	1.23443	0.146976	8.3318	7.96e-17	5.48e-15	APJ1
YOL155C	3300.15	1.31573	0.1238	10.6132	2.59e-26	4.28e-24	HPF1
YLL061W	93.7917	1.31753	0.125031	10.438	1.66e-25	2.42e-23	MMP1
YDR343C	1008.85	1.3876	0.223489	5.87267	4.29e-09	1.17e-07	HXT6
YHL040C	387.063	1.40204	0.126445	11.0368	2.54e-28	4.44e-26	ARN1
YLL053C	40.3598	1.44418	0.168313	8.31061	9.52e-17	6.41e-15	NA
YHR053C	4101.25	1.63321	0.17295	9.42316	4.38e-21	4.4e-19	CUP1-1
YOR384W	14.8318	1.63659	0.21403	6.86906	6.46e-12	2.81e-10	FRE5
YCR098C	346.491	1.83343	0.11067	16.4737	5.67e-61	6.95e-58	GIT1
YOR382W	90.3685	1.89929	0.189794	9.50543	1.99e-21	2.1e-19	FIT2
YOR383C	336.6	2.03707	0.143098	14.1303	2.47e-45	1.16e-42	FIT3
YGR142W	356.692	2.23649	0.222179	9.12382	7.25e-20	6.44e-18	BTN2
